# Supplementary material for: Kinetics of SARS-CoV-2 Specific and Neutralizing Antibodies over Seven Months after Symptom Onset in COVID-19 Patients
Source: PubMed Central journal article supplement (PMC8557935; doi:10.1128/spectrum.00590-21), 2021-09-22

**Supplemental Table 1. The exact values of ID<sub>50</sub> titers of 53 COVID-19 convalescent patients at discharge and seven months after symptom onset.**

| Code | ID <sub>50</sub> at discharge | ID <sub>50</sub> at Follow-up | Change    | Gender | Age |
|------|-------------------------------|-------------------------------|-----------|--------|-----|
| 1    | 10                            | 20                            | Increased | Female | 53  |
| 2    | 20                            | 40                            | Increased | Female | 53  |
| 3    | 20                            | 10                            | Decreased | Female | 62  |
| 6    | 160                           | 160                           | Retained  | Male   | 61  |
| 7    | 320                           | 160                           | Decreased | Female | 51  |
| 8    | 640                           | 160                           | Decreased | Female | 45  |
| 9    | 80                            | 160                           | Increased | Female | 42  |
| 10   | 80                            | 80                            | Retained  | Female | 78  |
| 11   | 80                            | 10                            | Decreased | Male   | 30  |
| 12   | 80                            | 80                            | Retained  | Male   | 50  |
| 13   | 160                           | 40                            | Decreased | Female | 63  |
| 14   | 40                            | 40                            | Retained  | Female | 57  |
| 16   | 20                            | 5                             | Decreased | Female | 65  |
| 17   | 640                           | 160                           | Decreased | Female | 57  |
| 18   | 160                           | 80                            | Decreased | Female | 53  |
| 19   | 160                           | 160                           | Retained  | Female | 63  |
| 21   | 20                            | 10                            | Decreased | Male   | 56  |
| 22   | 160                           | 40                            | Decreased | Male   | 59  |
| 23   | 320                           | 160                           | Decreased | Female | 59  |
| 24   | 640                           | 160                           | Decreased | Male   | 58  |
| 25   | 640                           | 80                            | Decreased | Male   | 58  |
| 29   | 40                            | 40                            | Retained  | Male   | 40  |
| 30   | 40                            | 10                            | Decreased | Female | 40  |
| 31   | 320                           | 160                           | Decreased | Male   | 59  |
| 32   | 640                           | 320                           | Decreased | Male   | 54  |
| 33   | 640                           | 160                           | Decreased | Male   | 77  |
| 34   | 80                            | 80                            | Retained  | Female | 55  |
| 35   | 160                           | 40                            | Decreased | Male   | 29  |
| 36   | 320                           | 160                           | Decreased | Female | 51  |
| 37   | 320                           | 40                            | Decreased | Female | 48  |

|    |     |     |           |        |    |
|----|-----|-----|-----------|--------|----|
| 38 | 320 | 40  | Decreased | Female | 49 |
| 39 | 160 | 40  | Decreased | Female | 33 |
| 40 | 80  | 40  | Decreased | Male   | 63 |
| 41 | 10  | 10  | Retained  | Female | 14 |
| 42 | 5   | 5   | Retained  | Male   | 31 |
| 43 | 80  | 40  | Decreased | Male   | 33 |
| 44 | 320 | 80  | Decreased | Female | 48 |
| 45 | 40  | 40  | Retained  | Female | 21 |
| 47 | 40  | 80  | Increased | Female | 48 |
| 49 | 160 | 20  | Decreased | Female | 29 |
| 50 | 160 | 20  | Decreased | Female | 23 |
| 51 | 320 | 80  | Decreased | Female | 26 |
| 52 | 160 | 40  | Decreased | Female | 45 |
| 53 | 5   | 5   | Retained  | Male   | 32 |
| 54 | 80  | 20  | Decreased | Female | 39 |
| 55 | 80  | 80  | Retained  | Female | 73 |
| 56 | 5   | 40  | Increased | Male   | 79 |
| 57 | 160 | 40  | Decreased | Female | 63 |
| 59 | 20  | 80  | Increased | Male   | 57 |
| 60 | 40  | 80  | Increased | Male   | 27 |
| 61 | 20  | 160 | Increased | Male   | 67 |
| 62 | 5   | 5   | Retained  | Female | 24 |
| 63 | 10  | 40  | Increased | Male   | 51 |

---

**Supplemental Figure 1. Number and proportion of convalescent individuals with different disease severity in each quartile of days after symptom onset.** The numbers of four disease severity kinds of all 284 (A), IgM positive (B) and IgG positive (C) convalescent participants are shown in the different color bar while percentage values denote the corresponding proportion.

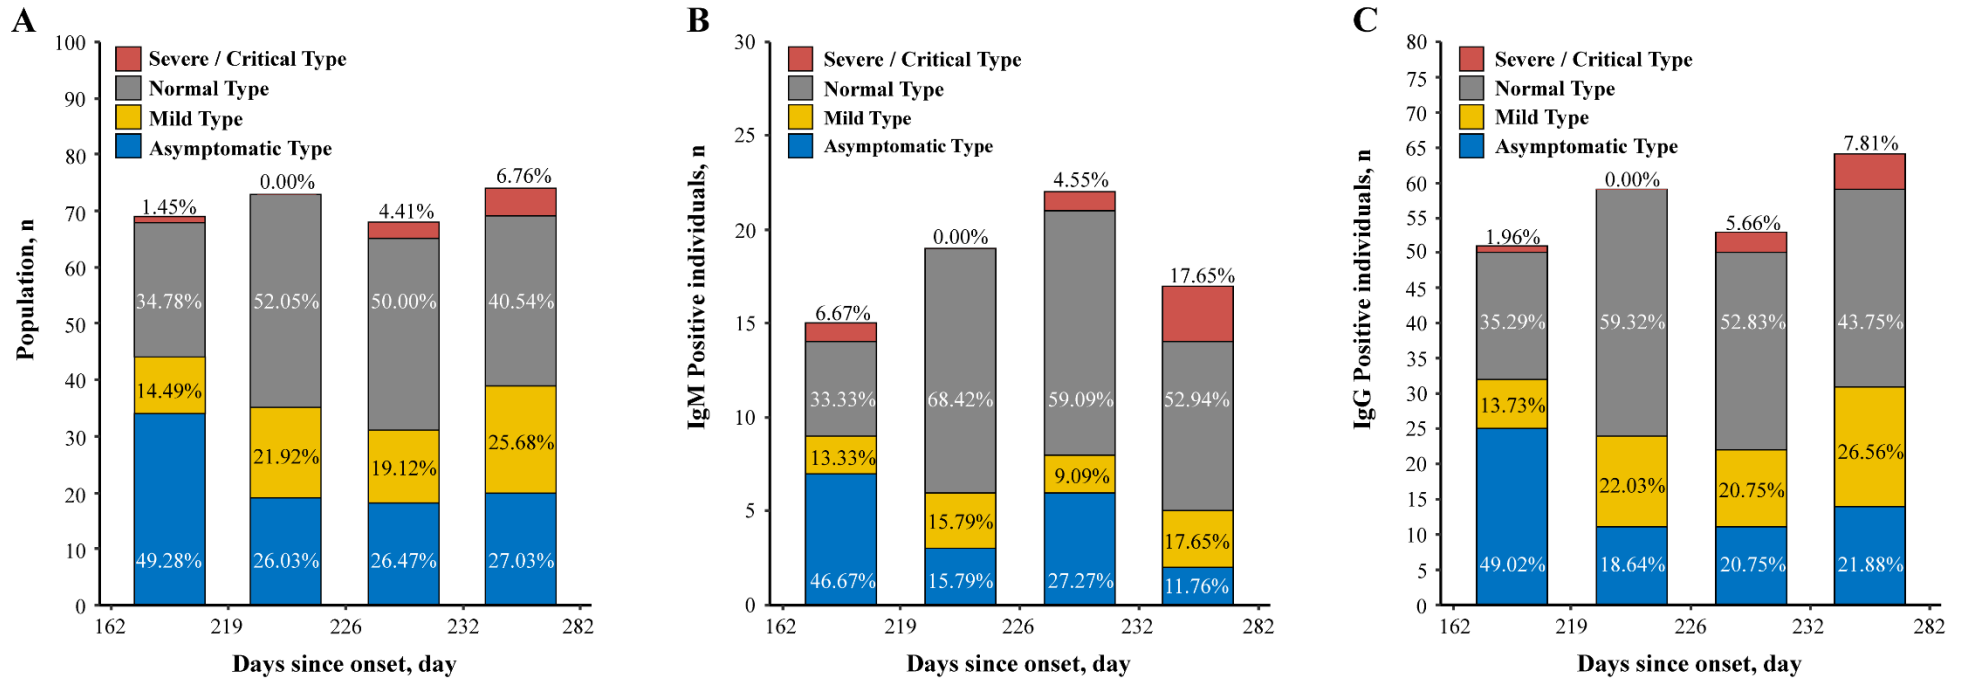

**Supplemental Figure 2. Seropositivity and antibody chemiluminescence values of IgM and IgG of different disease severity individuals against SARS-**

**CoV-2 at discharge and follow-up.** (A) and (B): positive rates of IgM and IgG in different disease severity types presented in bar plots respectively; (C) and

(D): chemiluminescent immunoassay measurements of IgM and IgG in different disease severity types presented in box plots respectively. In 64 convalescent

individuals tested at discharge and follow-up, no one belonged to severe/critical type.  $P_a$  represents that the  $P$  value was produced by Chi-square test;  $p_b$

represents that the  $P$  value was produced by Fisher's exact test;  $p_c$  represents that the  $P$  value was produced by Wilcoxon rank-sum (Mann-Whitney) test.

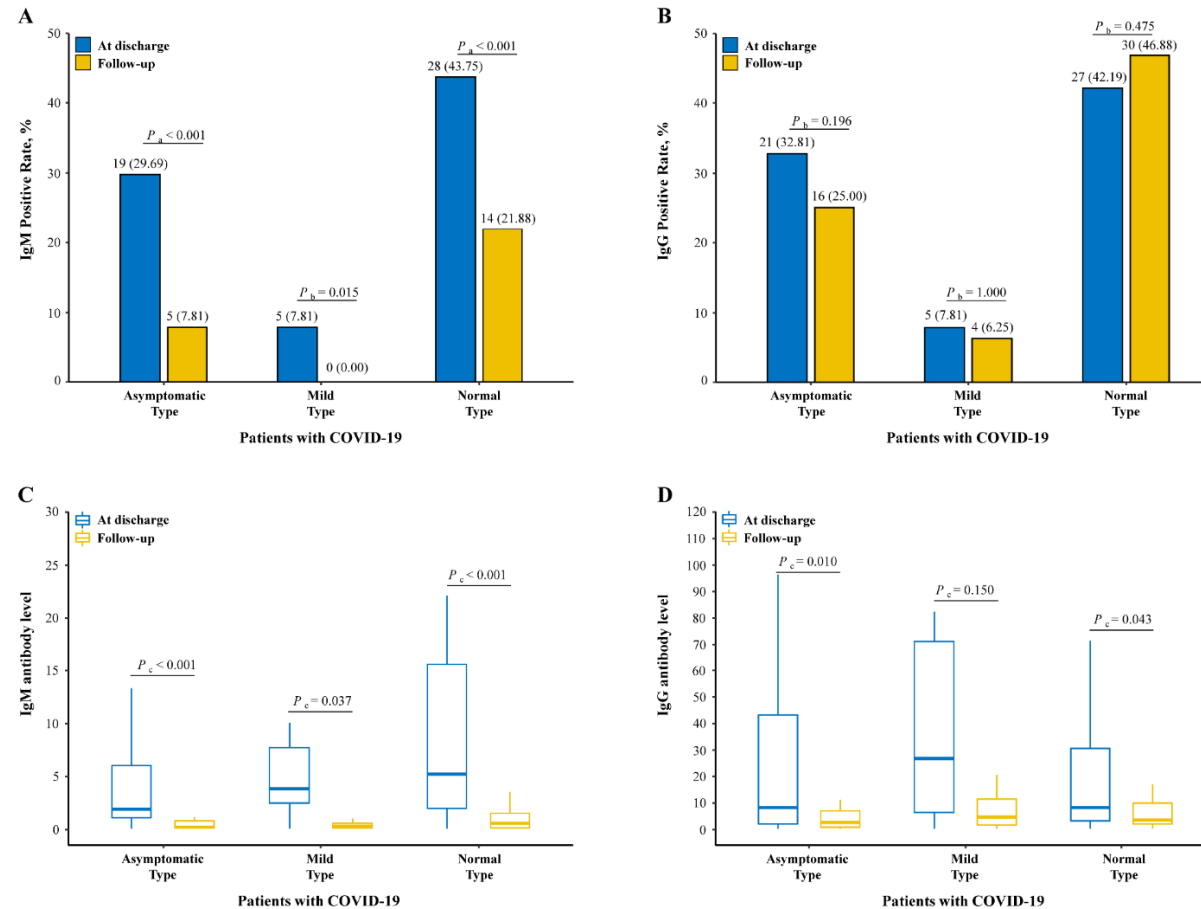

Supplement: spectrum00590-21_supp_1_seq10.pdf [file spectrum00590-21_supp_1_seq10.pdf]
